# Supplementary material for: Effect of intraoperative remimazolam on postoperative sleep quality in elderly patients after total joint arthroplasty: a randomized control trial
Source: PubMed Central journal article supplement (PMC10390348; doi:10.1007/s00540-023-03193-5), 2023-04-13

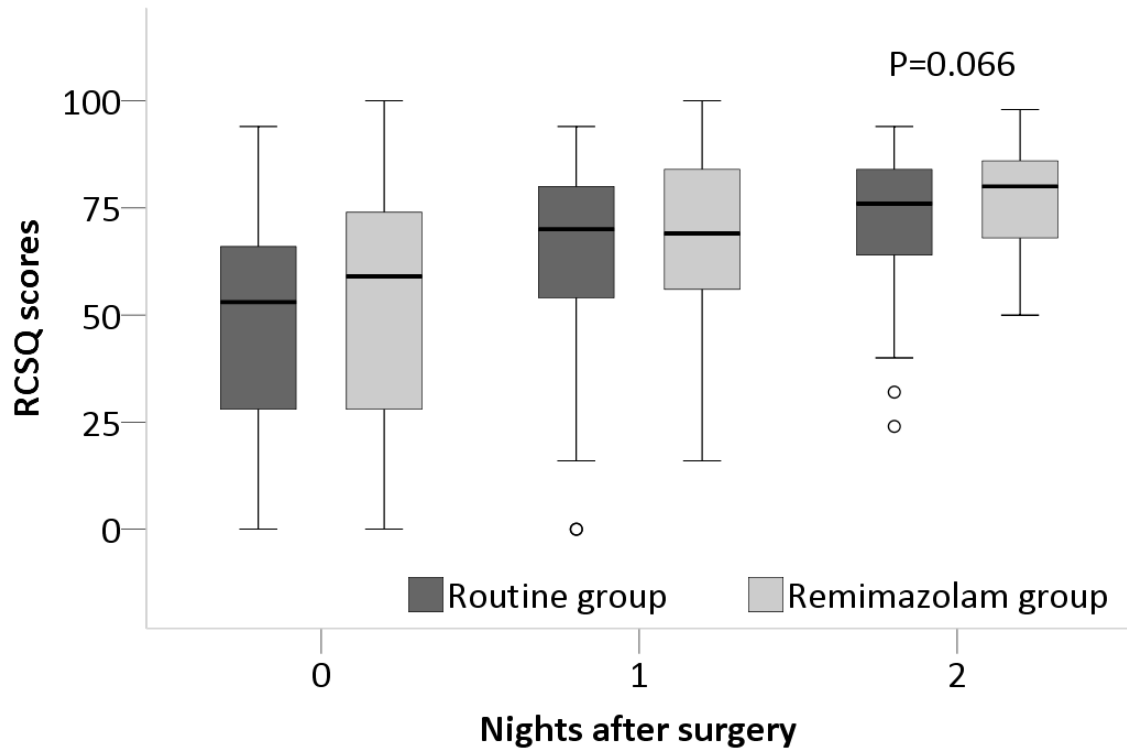

Supplement: 540_2023_3193_MOESM1_ESM.pdf [file 540_2023_3193_MOESM1_ESM.pdf]
